## CORRESPONDENCE

While awaiting arrival of the emergency team, the nurse administered 100% O<sub>2</sub> by a self-inflating device. On arrival, the emergency team noted no spontaneous respirations, pinpoint pupils, pulse 78 beats/min, and blood pressure 118/60 mmHg. She was unresponsive to verbal commands and vigorous shaking. Fetal heart rate (FHR) was 60 beats/min from a baseline of 130. Naloxone (0.4 mg) was given as an intravenous bolus to which the patient responded immediately with prompt awakening. Seven minutes after naloxone, FHR increased to 150–160 beats/min. The rest of her labor course was unremarkable.

At 4:20 PM, the patient underwent a normal spontaneous vaginal delivery of an 8-lb, 1-oz male infant with Apgar scores of 9 and 10 at 1 and 5 min, respectively.

Sufentanil is a highly lipophilic opioid with a strong affinity for the opioid receptors. Its lipophilicity is advantageous in limiting its mean residence time in CSF, thereby minimizing potential side effects, such as delayed respiratory depression.<sup>1,2</sup> However, early respiratory depression is of concern. Recently, a case report appeared that described respiratory depression after a single dose of intrathecal sufentanil in a laboring parturient.<sup>3</sup>

The exact mechanism by which the respiratory arrest occurred in our patient is not clear. According to the study by Hansdottir *et al.*, intrathecal sufentanil has a mean residence time of 0.9 h in CSF but almost 7 h in plasma.<sup>1</sup> They pointed out that, after repeated doses of intrathecal sufentanil, there was a theoretical risk of accumulation of this drug in plasma but not in CSF. This may explain the respiratory arrest seen in our patient. The second dose of sufentanil was given approximately 3 h, 40 min after the first dose, at a time when the plasma concentration of the first dose, insufficient by itself, may have been augmented by the second dose to that above the threshold for respiratory arrest. However, cephalad migration of sufentanil in the CSF, leading to central respiratory depression, cannot be ruled out. D'Angelo *et al.*, from their observation of the cephalad extent of sensory changes resulting from intrathecal sufentanil administered at the lumbar spinal level, cautioned about the potential for respiratory depression.<sup>4</sup>

There are few data regarding the optimal dose of intrathecal sufentanil for labor analgesia, for either the initial bolus or repeat doses.

\* Van Decar T, Callicot R, Jones R, Herman N: Determination of a dose response curve for intrathecal sufentanil in labor, 26th Annual Meeting, Society of Obstetric Anesthesia and Perinatology, May 1994.

Anesthesiology  
83:232–233, 1995  
© 1995 American Society of Anesthesiologists, Inc.  
Lippincott-Raven Publishers

## Sevoflurane, Fluoride Ion, and Renal Toxicity

**To the Editor:**—In a recent editorial regarding a study by Kharasch *et al.*,<sup>1</sup> Brown<sup>2</sup> claims that sevoflurane is "biotransformed in a quantitative fashion similar to enflurane." How "similar" are they? In patients with renal impairment, sevoflurane administration resulted

An abstract addressing this issue suggests that there may be no advantage to using doses in excess of 7.5 µg intrathecal sufentanil.<sup>3</sup> Whether such a dose would reduce the likelihood of early respiratory depression remains to be investigated.

We wish to emphasize that patients receiving intrathecal sufentanil be monitored closely after each dose. As suggested by Hays and Palmer, this should include checking the respiratory rate every 15 min for the first hour after injection and every 30 min for the next 2 h.<sup>3</sup> It may be prudent to note the cephalad spread of sensory changes after each dose. Appropriate resuscitation equipment and personnel must be immediately available. Furthermore, dose-response studies are necessary to establish the optimal dosage schedule for single injection and continuous intrathecal sufentanil for labor analgesia.

**Michael N. Baker, M.D.**  
Director of Anesthesia  
Department of Anesthesia  
York Hospital  
York, Maine 03909

**Mukesh C. Sarna, M.D., F.R.C.A., F.F.A.R.C.S.(I.)**  
Associate Director of Obstetric Anesthesia  
Department of Anesthesia and Critical Care  
330 Brookline Avenue  
Beth Israel Hospital  
Boston, Massachusetts 02115

## References

1. Hansdottir V, Hedner T, Woestenborghs R, Nordberg G: The CSF and plasma pharmacokinetics of sufentanil after intrathecal administration. *ANESTHESIOLOGY* 74:264–269, 1991
2. Van Der Auwera D, Verborgh C, Camu F: Analgesic and cardiorespiratory effects of epidural sufentanil and morphine in humans. *Anesth Analg* 66:999–1003, 1987
3. Hays RL, Palmer CM: Respiratory depression after intrathecal sufentanil during labor. *ANESTHESIOLOGY* 81:511–512, 1994
4. D'Angelo R, Anderson MT, Philip J, Eisenach JC: Intrathecal sufentanil compared to epidural bupivacaine for labor analgesia. *ANESTHESIOLOGY* 80:1209–1215, 1994

(Accepted for publication April 18, 1995.)

in average serum fluoride concentrations 85% greater than those given enflurane.<sup>3</sup> It has been reported that 8.1% of adult patients given sevoflurane had a serum fluoride concentration greater than 50 µM.<sup>4</sup> What is the corresponding percentage for enflurane? Brown's con-

tion that sevoflurane is not biotransformed simply is not tenable.

Also, nothing was mentioned in the abstract of the biotransformation by cytochrome P-450, namely hexafluoroisopropanol, a product that eventually results from the metabolism of sevoflurane. Sevoflurane is metabolized to hexafluoroisopropanol and desflurane in that it has a hydroxyl group rather than a difluoromethyl group, and desflurane necessarily undergoes a different metabolic pathway.

The frenetic push toward convective clearance of HEP plus the fact that sevoflurane is an old anesthetic that has been heavily biotransformed in clinical practice in 1959? Seven years later, methoxyflurane was reported to have been given with the same results. How long did it take for the existence of halothane-related toxicity to be apparent? Of course, these toxicities? No. Our recent strategy of using agents that undergo the lowest possible metabolism makes sense.

The notion that somehow serum levels of sevoflurane, to which Brown<sup>2</sup> refers, are so much importance, obscures a more important issue, which soon may be given. Sevoflurane is heavily biotransformed, and the "shibboleths and jigsaw puzzles" issue is not resolved.

Kharasch *et al.*<sup>1</sup> point out that in their study, they cite the example that desflurane increases methoxyflurane P-450-dependent release, diminishes renal toxicity. The authors attempted to dissociate serum levels from renal toxicity, by concluding that concentrations nor duration of fluorinated inhalation anesthetics to be nonselectively to all anesthetics to be. They imply that there may be some metabolic consequence of methoxyflurane.

Anesthesiology  
83:233–234, 1995  
© 1995 American Society of Anesthesiologists  
Lippincott-Raven Publishers

**In Reply:**—My editorial<sup>1</sup> was focused on the article by Kharasch *et al.*<sup>2</sup> concerning compound A, hexafluoroisopropanol, both political and scientific. The editorial was strictly confined to compound A, that local renal production and hepatic clearance of fluoride ion may be of greater importance than measured by the plasma fluoride ion. And Baker's contention, neither n-

## CORRESPONDENCE

tention that sevoflurane is not biotransformed to a greater extent than enflurane simply is not tenable.

Also, nothing was mentioned in the editorial about the *other* products of the biotransformation by cytochrome P450 of sevoflurane *in vivo*, namely hexafluoroisopropanol (HFIP) and the single carbon product that eventually results from the broken-off fluoromethoxy group of sevoflurane. Sevoflurane is unique compared to enflurane, isoflurane, and desflurane in that it contains a monofluorinated methoxy group rather than a difluoromethoxy group. The former by necessity undergoes a different mechanism of biotransformation after initial P450 metabolic attack.

The frenetic push toward convincing us that all this fluoride (and stoichiometric amounts of HFIP plus single carbon fragments) is not clinically important, is an attempt to obfuscate the fact that sevoflurane is an old anesthetic that moves us back in the direction of the heavily biotransformed agents of the past. How long did it take to report methoxyflurane nephrotoxicity after its introduction to clinical practice in 1959? Seven years. How many millions of anesthetics had been given with it by then before that particular toxicity became apparent? How long did it take before (most of us) recognized the existence of halothane-related hepatotoxicity? Are these toxicities related to biotransformation? Of course. Can we remotely predict these toxicities? No. Our recent strategy has been to develop volatile agents that undergo the lowest possible biotransformation, a strategy that makes sense.

The notion that somehow serum fluoride is no longer important in nephrotoxicity, to which Brown<sup>2</sup> and Kharasch *et al.*<sup>1</sup> have attached so much importance, obscures a more basic and important fact about this drug, which soon may be given to millions of Americans. Sevoflurane *is* heavily biotransformed. The editorialist's aversion to "shibboleths and jigsaw puzzles"<sup>1</sup> notwithstanding, the "fluoride issue" is *not* resolved.

Kharasch *et al.*<sup>1</sup> point out that inorganic fluoride is a nephrotoxin and cite the example that deuteration of methoxyflurane, which decreases methoxyflurane P450-dependent metabolism and fluoride release, diminishes renal toxicity. Despite their own citation, these authors attempted to dissociate serum fluoride concentrations from renal toxicity, by concluding that "neither peak systemic fluoride concentrations nor duration of fluoride increase alone can be applied nonselectively to all anesthetics to explain or predict nephrotoxicity." They imply that there may be some other metabolite or unknown metabolic consequence of methoxyflurane biotransformation that

causes renal toxicity. After many years of methoxyflurane study, none has been found. Further, they suggest, without proposing any mechanism, that the small amount of fluoride produced *in* the kidney is relevant to nephrotoxicity, whereas the large amount of serum fluoride that passes *through* the kidney for excretion is irrelevant.

We moved steadily, after the first fluorocarbon anesthetics were introduced, toward agents with less biotransformation, for sound toxicologic reasons. Sevoflurane, which was rejected by Baxter-Travenol and Anaquest (Ohmeda) for clinical development, is a step backward, despite the likelihood that it will have desirable clinical characteristics.

**John H. Tinker, M.D.**  
Professor and Head  
**Max T. Baker, Ph.D.**  
Associate Professor  
Department of Anesthesia  
University of Iowa  
College of Medicine  
200 Hawkins Drive  
Iowa City, Iowa 52242-1009

## References

1. Kharasch ED, Hankins DC, Thummel KE: Human kidney methoxyflurane and sevoflurane metabolism: Intrarenal fluoride production as a possible mechanism of methoxyflurane nephrotoxicity. *ANESTHESIOLOGY* 82:689-699, 1995
2. Brown BR Jr: Shibboleths and jigsaw puzzles (editorial). *ANESTHESIOLOGY* 82:607-608, 1995
3. Melotte A, Verhaegen M, Conzen P, Van Aken H, Peter K: Plasma inorganic fluoride levels after sevoflurane or enflurane anesthesia in patients with renal impairment (abstract). *ANESTHESIOLOGY* 81:A368, 1994
4. Stickler T, Callan C, Sayre J, Blahunka K, Prokocimer P: Incidence of inorganic fluoride concentrations  $\geq 50 \mu\text{mol/l}$  in sevoflurane comparative clinical studies (abstract). *ANESTHESIOLOGY* 81:A1283, 1994

(Accepted for publication April 29, 1995.)

Anesthesiology  
83:233-234, 1995  
© 1995 American Society of Anesthesiologists, Inc.  
Lippincott-Raven Publishers

**In Reply:**—My editorial<sup>1</sup> was focused only on my thoughts concerning the article by Kharasch *et al.*<sup>2</sup> in the same issue. The toxicity of compound A, hexafluoroisopropanol toxicity, and other aspects of sevoflurane, both political and scientific, were not discussed. The editorial was strictly confined to commentaries of the novel concept that local renal production and hence high local renal concentrations of fluoride ion may be of greater importance in renal toxicity from fluorinated inhalation anesthetics than is hepatic fluoride production as measured by the plasma fluoride concentration. Contrary to Tinker and Baker's contention, neither my editorial (nor Kharasch *et al.*'s

original paper<sup>2</sup>) discounted the nephrotoxic potential of fluoride ions. The issue was whether renal or hepatic production of fluoride was the more important vector of nephrotoxicity with inhalation anesthetics. The fact remains that several publications have documented plasma fluoride concentrations well in excess of  $50 \mu\text{M}$ , whether from sevoflurane, enflurane, isoflurane, or fluoride ion intoxication,<sup>3</sup> without evidence of renal toxicity.

Tinker and Baker refer repeatedly to "heavy biotransformation." Let me supply the facts. Eight percent of the enflurane dose and 3-5% of the sevoflurane dose<sup>4,5</sup> are metabolized. Tinker and Baker are
